# Supplementary material for: Use of Anti-Thrombotic Drugs and In-Hospital Mortality in Acute Aortic Dissection Patients
Source: MDPI journal article supplement (doi:10.3390/diagnostics12102322), 2022-09-26
Supplement: s1 [file s1]

Suppl Table S3. Cox proportional hazard model for all-cause mortality in HOSPITALIZED acute aortic dissection patients (type A)

|                                                                     | Model 1 |        |                 | Model 2 |        |                 | Model 3 |        |                 | Model 4 |        |                 |
|---------------------------------------------------------------------|---------|--------|-----------------|---------|--------|-----------------|---------|--------|-----------------|---------|--------|-----------------|
|                                                                     | $\beta$ | SE     | p-value         |
| Age                                                                 | 0.006   | 0.01   | 0.65            | -       | -      | -               | -       | -      | -               | -       | -      | -               |
| Sex                                                                 | -0.11   | 0.31   | 0.72            | -       | -      | -               | -       | -      | -               | -       | -      | -               |
| Systolic BP                                                         | -0.02   | 0.006  | <b>&lt;0.01</b> | -0.02   | 0.006  | <b>&lt;0.01</b> | -       | -      | -               | -       | -      | -               |
| Diastolic BP                                                        | -0.005  | 0.01   | 0.63            | -0.005  | 0.01   | 0.61            | 0.021   | 0.015  | 0.16            | 0.02    | 0.016  | 0.23            |
| Heart rate                                                          | 0.01    | 0.008  | 0.11            | 0.012   | 0.008  | 0.12            | -0.0014 | 0.0081 | 0.87            | -0.004  | 0.0088 | 0.65            |
| eGFR                                                                | -0.028  | 0.007  | <b>&lt;0.01</b> | -0.028  | 0.007  | <b>&lt;0.01</b> | -0.027  | 0.0081 | <b>&lt;0.01</b> | -       | -      | -               |
| Surgery                                                             | -1.7    | 0.33   | <b>&lt;0.01</b> | -1.7    | 0.33   | <b>&lt;0.01</b> | -       | -      | -               | -       | -      | -               |
| JCS                                                                 | 0.82    | 0.13   | <b>&lt;0.01</b> | 0.83    | 0.13   | <b>&lt;0.01</b> | 0.73    | 0.16   | <b>&lt;0.01</b> | 0.61    | 0.18   | <b>&lt;0.01</b> |
| Past history                                                        |         |        |                 |         |        |                 |         |        |                 |         |        |                 |
| A Fib                                                               | -1.34   | 1.01   | 0.19            | -1.48   | 1.02   | 0.15            | -1.29   | 1.03   | 0.21            | -       | -      | -               |
| CAD                                                                 | 0.67    | 0.53   | 0.21            | 0.63    | 0.53   | 0.23            | 0.77    | 0.55   | 0.16            | -       | -      | -               |
| Other CVD                                                           | 0.22    | 0.42   | 0.6             | 0.17    | 0.42   | 0.69            | 0.15    | 0.43   | 0.73            | -       | -      | -               |
| PAD                                                                 | 0.04    | 0.45   | 0.93            | -0.04   | 0.46   | 0.93            | 0.072   | 0.47   | 0.88            | -0.012  | 0.49   | 0.98            |
| VTE                                                                 | -12.01  | 915.23 | 0.99            | -12.04  | 919.33 | 0.99            | -12.3   | 1167   | 0.99            | -13.3   | 2050   | 0.99            |
| LV dysfunction                                                      | -13.04  | 930.19 | 0.99            | -13.02  | 930.55 | 0.99            | -12.1   | 0.5    | 0.73            | -       | -      | -               |
| HT                                                                  | -0.28   | 0.48   | 0.56            | -0.33   | 0.48   | 0.5             | -0.18   | 0.5    | 0.73            | -0.46   | 0.53   | 0.39            |
| DM                                                                  | -0.56   | 0.73   | 0.44            | -0.58   | 0.73   | 0.42            | -       | -      | -               | -       | -      | -               |
| DLp                                                                 | -0.23   | 0.42   | 0.58            | -0.2    | 0.42   | 0.63            | -       | -      | -               | -       | -      | -               |
| Genetic and others                                                  | 0.47    | 0.77   | 0.54            | 0.58    | 0.78   | 0.46            | 0.53    | 0.87   | 0.55            | 1.37    | 0.88   | 0.12            |
| Smoking                                                             | -0.52   | 0.36   | 0.15            | -0.78   | 0.42   | 0.06            | -       | -      | -               | -       | -      | -               |
| Alcohol                                                             | -0.52   | 0.38   | 0.18            | -0.65   | 0.43   | 0.13            | -0.58   | 0.45   | 0.2             | -0.26   | 0.49   | 0.59            |
| post-AVR                                                            | 1.03    | 0.73   | 0.16            | 1.004   | 0.75   | 0.18            | 1.64    | 0.78   | <b>0.03</b>     | 1.7     | 0.84   | <b>0.04</b>     |
| post-MVR                                                            | 0       |        |                 | 0       |        |                 | 0       |        |                 | 0       |        |                 |
| CABG                                                                | -12.01  | 776.4  | 0.99            | -12.14  | 778.45 | 0.99            | -12.1   | 1153   | 0.99            | -13.9   | 2048   | 0.99            |
| Intervention to aortic aneurysm and/or dissection                   | 0.1     | 0.61   | 0.87            | 0.019   | 0.63   | 0.98            | 0.44    | 0.64   | 0.5             | 0.32    | 0.67   | 0.63            |
| Complication                                                        |         |        |                 |         |        |                 |         |        |                 |         |        |                 |
| Major bleeding                                                      | 1.66    | 0.38   | <b>&lt;0.01</b> | 1.62    | 0.39   | <b>&lt;0.01</b> | 1.99    | 0.44   | <b>&lt;0.01</b> | 2.24    | 0.48   | <b>&lt;0.01</b> |
| Infarction by aortic dissection                                     | 1.63    | 0.33   | <b>&lt;0.01</b> | 1.64    | 0.33   | <b>&lt;0.01</b> | 1.68    | 0.36   | <b>&lt;0.01</b> | 1.45    | 0.39   | <b>&lt;0.01</b> |
| Paroxymal A Fib                                                     | -1.27   | 0.53   | <b>0.02</b>     | -1.34   | 0.53   | <b>0.01</b>     | -1.16   | 0.54   | <b>0.03</b>     | -1.49   | 0.62   | <b>0.02</b>     |
| Medication on admission                                             |         |        |                 |         |        |                 |         |        |                 |         |        |                 |
| RAAS inhibitor                                                      | -0.073  | 0.38   | 0.85            | -0.11   | 0.38   | 0.77            | -0.077  | 0.4    | 0.85            | -0.16   | 0.42   | 0.71            |
| CCB                                                                 | 0.54    | 0.35   | 0.12            | 0.52    | 0.36   | 0.14            | 0.85    | 0.38   | <b>0.03</b>     | 0.81    | 0.42   | 0.06            |
| $\beta$ -blocker                                                    | -0.1    | 0.49   | 0.84            | -0.15   | 0.49   | 0.76            | 0.15    | 0.51   | 0.77            | -0.016  | 0.59   | 0.98            |
| diuretics                                                           | 0.58    | 0.54   | 0.28            | 0.52    | 0.54   | 0.34            | 1.26    | 0.57   | <b>0.03</b>     | 0.97    | 0.63   | 0.12            |
| $\alpha$ -blocker                                                   | 1.32    | 0.61   | <b>0.03</b>     | 1.31    | 0.61   | <b>0.03</b>     | 1.66    | 0.65   | <b>0.01</b>     | 1.7     | 0.67   | <b>0.01</b>     |
| warfarin                                                            | 0.23    | 0.61   | 0.71            | 0.14    | 0.63   | 0.83            | 0.13    | 0.65   | 0.85            | 0.38    | 0.84   | 0.65            |
| DOAC                                                                | -13.03  | 969.9  | 0.99            | -13.12  | 972.53 | 0.99            | -12.8   | 1184   | 0.99            | -12.3   | 2183   | 0.99            |
| aspirin                                                             | 0.61    | 0.54   | 0.26            | 0.55    | 0.55   | 0.31            | 0.82    | 0.56   | 0.15            | 0.68    | 0.69   | 0.32            |
| clopidogrel                                                         | -14.21  | 884.34 | 0.99            | -14.39  | 881.58 | 0.99            | -13.5   | 1183   | 0.99            | -14.5   | 1343   | 0.99            |
| cilostazol                                                          | -13.04  | 823.72 | 0.99            | -13.05  | 824.28 | 0.99            | -13.2   | 1208   | 0.99            | -13.4   | 1289   | 0.99            |
| prasugrel                                                           | 0       |        |                 | 0       |        |                 | 0       |        |                 | 0       |        |                 |
| other anti-platelet drug                                            | 1.69    | 1.02   | 0.1             | 1.62    | 1.03   | 0.12            | 2.24    | 1.15   | 0.05            | 2.38    | 1.23   | 0.05            |
| Anti-thrombus during hospitalization                                |         |        |                 |         |        |                 |         |        |                 |         |        |                 |
| Anti-coagulant (warfarin or DOAC)                                   | -1.62   | 0.6    | <b>&lt;0.01</b> | -1.64   | 0.6    | <b>&lt;0.01</b> | -1.58   | 0.62   | <b>0.01</b>     | -1.47   | 0.63   | <b>0.02</b>     |
| Anti-platelet drug (aspirin, clopidogrel, cilostazol, or prasugrel) | -2.88   | 1.01   | <b>&lt;0.01</b> | -2.9    | 1.01   | <b>&lt;0.01</b> | -2.58   | 1.02   | <b>0.01</b>     | -2.74   | 1.03   | <b>0.008</b>    |
| Both anti-coagulant and anti-platelet                               | -15.2   | 860.56 | 0.99            | -15.19  | 859.87 | 0.99            | -15.4   | 1040   | 0.99            | -15.8   | 1145   | 0.99            |
| Anti-coagulant or anti-platelet                                     | -2.12   | 0.53   | <b>&lt;0.01</b> | -2.17   | 0.53   | <b>&lt;0.01</b> | -2      | 0.54   | <b>&lt;0.01</b> | -1.95   | 0.56   | <b>&lt;0.01</b> |

Model 1 : Unadjusted

Model 2 : Adjusted for age and sex

Model 3 : Adjusted for age, sex, surgery, systolic BP, DLp, DM and smoking

Model 4 : Model 3 + history of A fib, CAD, other CVD and LV dysfunction

SE; standard error, HR, hazard ratio, BP; blood pressure, eGFR; estimated glomerular filtration rate, A Fib; atrial fibrillation, CAD; coronary artery diseases, CVD; cardiovascular diseases, PAD; peripheral arterial diseases, VTE; venous thromboembolism, LV; left ventricular, HT; hypertension, DM; diabetes mellitus, DLp: dyslipidemia, AVR; aortic valve replacement, MVR; mitral valve replacement, CABG; coronary artery bypass grafting, RAAS; renin-angiotensin-aldosterone system, CCB; calcium channel blocker, DOAC; direct oral anti-coagulant.

Genetic and others includes Marfan syndrome, Loeys-Dietz syndrome, and Behçet's disease.
