# Supplementary material for: Use of Anti-Thrombotic Drugs and In-Hospital Mortality in Acute Aortic Dissection Patients
Source: MDPI journal article supplement (doi:10.3390/diagnostics12102322), 2022-09-26
Supplement: s1 [file s1]

Suppl Table S1. Cox proportional hazard model for all-cause mortality in TRANSFERRED acute aortic dissection patients (type A)

|                                                                     | Model 1 |        |                 | Model 2 |        |                 | Model 3 |       |                 | Model 4 |       |                 |
|---------------------------------------------------------------------|---------|--------|-----------------|---------|--------|-----------------|---------|-------|-----------------|---------|-------|-----------------|
|                                                                     | $\beta$ | SE     | p-value         | $\beta$ | SE     | p-value         | $\beta$ | SE    | p-value         | $\beta$ | SE    | p-value         |
| Age                                                                 | 0.01    | 0.01   | 0.23            | -       | -      | -               | -       | -     | -               | -       | -     | -               |
| Sex                                                                 | -0.02   | 0.23   | 0.94            | -       | -      | -               | -       | -     | -               | -       | -     | -               |
| Systolic BP                                                         | -0.02   | <0.01  | <b>&lt;0.01</b> | -0.02   | 0.004  | <b>&lt;0.01</b> | -       | -     | -               | -       | -     | -               |
| Diastolic BP                                                        | -0.01   | 0.008  | 0.19            | -0.01   | 0.008  | 0.17            | 0.004   | 0.01  | 0.76            | 0.01    | 0.01  | 0.51            |
| Heart rate                                                          | 0.011   | 0.006  | 0.05            | 0.01    | 0.006  | 0.07            | -0.003  | 0.007 | 0.68            | -0.004  | 0.007 | 0.57            |
| eGFR                                                                | -0.028  | 0.006  | <b>&lt;0.01</b> | -0.03   | 0.006  | <b>&lt;0.01</b> | -0.027  | 0.007 | <b>&lt;0.01</b> | -       | -     | -               |
| Surgery                                                             | -2.39   | 0.25   | <b>&lt;0.01</b> | -2.38   | 0.25   | <b>&lt;0.01</b> | -       | -     | -               | -       | -     | -               |
| JCS                                                                 | 0.86    | 0.1    | <b>&lt;0.01</b> | 0.85    | 0.1    | <b>&lt;0.01</b> | 0.54    | 0.14  | <b>&lt;0.01</b> | 0.4     | 0.17  | <b>0.01</b>     |
| Past history                                                        |         |        |                 |         |        |                 |         |       |                 |         |       |                 |
| A Fib                                                               | -1.05   | 0.72   | 0.15            | -1.21   | 0.72   | 0.1             | -0.8    | 0.74  | 0.28            | -       | -     | -               |
| CAD                                                                 | 0.76    | 0.4    | 0.06            | 0.7     | 0.4    | 0.09            | 0.7     | 0.49  | 0.15            | -       | -     | -               |
| Other CVD                                                           | 0.005   | 0.36   | 0.99            | -0.08   | 0.37   | 0.83            | -0.08   | 0.4   | 0.84            | -       | -     | -               |
| PAD                                                                 | 0.16    | 0.35   | 0.64            | 0.05    | 0.36   | 0.89            | 0.08    | 0.41  | 0.85            | 0.07    | 0.43  | 0.87            |
| VTE                                                                 | -12.01  | 744.56 | 0.99            | -12.06  | 752.05 | 0.99            | -11.5   | 771.4 | 0.98            | -12.3   | 1284  | 0.99            |
| LV dysfunction                                                      | -13.03  | 789.73 | 0.99            | -12.99  | 788.9  | 0.99            | -12.4   | 1015  | 0.99            | -       | -     | -               |
| HT                                                                  | -0.8    | 0.31   | <b>0.01</b>     | -0.88   | 0.32   | <b>&lt;0.01</b> | -0.26   | 0.39  | 0.5             | -0.55   | 0.44  | 0.21            |
| DM                                                                  | -0.55   | 0.59   | 0.35            | -0.58   | 0.59   | 0.33            | -       | -     | -               | -       | -     | -               |
| DLp                                                                 | -0.23   | 0.33   | 0.49            | -0.2    | 0.34   | 0.56            | -       | -     | -               | -       | -     | -               |
| Genetic and others                                                  | 0.57    | 0.62   | 0.35            | 0.71    | 0.63   | 0.26            | 0.53    | 0.87  | 0.55            | 1.35    | 0.87  | 0.12            |
| Smoking                                                             | -0.64   | 0.31   | <b>0.04</b>     | -0.86   | 0.36   | <b>0.02</b>     | -       | -     | -               | -       | -     | -               |
| Alcohol                                                             | -0.68   | 0.34   | <b>0.04</b>     | -0.8    | 0.38   | <b>0.03</b>     | -0.67   | 0.4   | 0.1             | -0.56   | 0.46  | 0.22            |
| post-AVR                                                            | 1.02    | 0.59   | 0.09            | 1.01    | 0.61   | 0.1             | 1.3     | 0.63  | <b>0.04</b>     | 1.69    | 0.76  | <b>0.03</b>     |
| post-MVR                                                            | 0       | -      | -               | 0       | -      | -               | 0       | -     | -               | 0       | -     | -               |
| CABG                                                                | -12.01  | 627.8  | 0.98            | -12.24  | 633.99 | 0.98            | -11.5   | 822.9 | 0.98            | -13     | 1317  | 0.99            |
| Intervention to aortic aneurysm and/or dissection                   | 0.27    | 0.47   | 0.57            | 0.18    | 0.49   | 0.72            | 0.73    | 0.51  | 0.15            | 0.61    | 0.53  | 0.25            |
| Complication                                                        |         |        |                 |         |        |                 |         |       |                 |         |       |                 |
| Major bleeding                                                      | 1.52    | 0.32   | <b>&lt;0.01</b> | 1.48    | 0.32   | <b>&lt;0.01</b> | 1.86    | 0.37  | <b>&lt;0.01</b> | 2.3     | 0.43  | <b>&lt;0.01</b> |
| Infarction by aortic dissection                                     | 1.54    | 0.27   | <b>&lt;0.01</b> | 1.52    | 0.27   | <b>&lt;0.01</b> | 1.47    | 0.32  | <b>&lt;0.01</b> | 1.2     | 0.36  | <b>&lt;0.01</b> |
| Paroxymal A Fib                                                     | -1.66   | 0.52   | <b>&lt;0.01</b> | -1.75   | 0.52   | <b>&lt;0.01</b> | -1.28   | 0.53  | <b>0.02</b>     | -1.6    | 0.62  | <b>0.01</b>     |
| Medication on admission                                             |         |        |                 |         |        |                 |         |       |                 |         |       |                 |
| RAAS inhibitor                                                      | -0.06   | 0.31   | 0.85            | -0.14   | 0.31   | 0.66            | 0.09    | 0.34  | 0.79            | -0.12   | 0.37  | 0.75            |
| CCB                                                                 | 0.36    | 0.29   | 0.22            | 0.29    | 0.29   | 0.33            | 0.85    | 0.34  | <b>0.01</b>     | 0.88    | 0.39  | <b>0.02</b>     |
| $\beta$ -blocker                                                    | 0.04    | 0.39   | 0.93            | -0.05   | 0.39   | 0.89            | 0.34    | 0.44  | 0.44            | 0.03    | 0.55  | 0.96            |
| diuretics                                                           | 0.6     | 0.44   | 0.17            | 0.48    | 0.44   | 0.27            | 1.17    | 0.46  | <b>0.01</b>     | 1.19    | 0.52  | <b>0.02</b>     |
| $\alpha$ -blocker                                                   | 1.2     | 0.52   | <b>0.02</b>     | 1.16    | 0.52   | 0.03            | 1.23    | 0.54  | <b>0.02</b>     | 0.98    | 0.59  | 0.09            |
| warfarin                                                            | 0.16    | 0.53   | 0.77            | -0.002  | 0.54   | 0.99            | 0.1     | 0.56  | 0.85            | 0.34    | 0.78  | 0.66            |
| DOAC                                                                | -13.03  | 787.37 | 0.99            | -13.24  | 796.32 | 0.99            | -13.1   | 1146  | 0.99            | -12.8   | 2322  | 0.99            |
| aspirin                                                             | 0.8     | 0.41   | 0.05            | 0.75    | 0.42   | 0.07            | 0.85    | 0.5   | 0.09            | 0.47    | 0.68  | 0.49            |
| clopidogrel                                                         | -14.17  | 771.42 | 0.99            | -14.35  | 776.75 | 0.99            | -12.8   | 797.1 | 0.98            | -13.4   | 882.2 | 0.99            |
| cilostazol                                                          | -13.03  | 673.45 | 0.98            | -13.12  | 675.96 | 0.98            | -12.6   | 796.4 | 0.99            | -13.7   | 1306  | 0.99            |
| prasugrel                                                           | 0       | -      | -               | 0       | -      | -               | 0       | -     | -               | 0       | -     | -               |
| other anti-platelet drug                                            | 1.18    | 1.01   | 0.24            | 1.14    | 1.02   | 0.27            | 1.36    | 1.12  | 0.23            | 1.38    | 1.16  | 0.23            |
| Anti-coagulant (warfarin or DOAC)                                   | -0.33   | 0.52   | 0.52            | -0.48   | 0.53   | 0.36            | -0.07   | 0.54  | 0.9             | 0.25    | 0.73  | 0.73            |
| Anti-platelet drug (aspirin, clopidogrel, cilostazol, or prasugrel) | -0.02   | 0.38   | 0.96            | -0.11   | 0.38   | 0.78            | 0.46    | 0.46  | 0.32            | 0.14    | 0.61  | 0.82            |
| Both anti-coagulant and anti-platelet                               | 0.55    | 0.72   | 0.44            | 0.49    | 0.72   | 0.5             | 0.62    | 0.75  | 0.4             | 0.11    | 0.92  | 0.91            |
| Anti-coagulant or anti-platelet                                     | -0.26   | 0.34   | 0.45            | -0.41   | 0.36   | 0.25            | 0.14    | 0.41  | 0.74            | 0.24    | 0.58  | 0.68            |

Model 1 : Unadjusted

Model 2 : Adjusted for age and sex

Model 3 : Adjusted for age, sex, surgery, systolic BP, DLp, DM and smoking

Model 4 : Model 3 + history of A fib, CAD, other CVD and LV dysfunction

SE; standard error, HR, hazard ratio, BP; blood pressure, eGFR; estimated glomerular filtration rate, A Fib; atrial fibrillation, CAD; coronary artery diseases, CVD; cardiovascular diseases, PAD; peripheral arterial diseases, VTE; venous thromboembolism, LV; left ventricular, HT; hypertension, DM; diabetes mellitus, DLp; dyslipidemia, AVR; aortic valve replacement, MVR; mitral valve replacement, CABG; coronary artery bypass grafting, RAAS; renin-angiotensin-aldosterone system, CCB; calcium channel blocker, DOAC; direct oral anti-coagulant.

Genetic and others includes Marfan syndrome, Loeys-Dietz syndrome, and Behçet's disease.
