# Supplementary material for: Use of Anti-Thrombotic Drugs and In-Hospital Mortality in Acute Aortic Dissection Patients
Source: MDPI journal article supplement (doi:10.3390/diagnostics12102322), 2022-09-26
Supplement: s1 [file s1]

**Suppl Table S4. Cox proportional hazard model for all-cause mortality in HOSPITALIZED acute aortic dissection patients (type B)**

|                                                                     | Model 1 |       |                 | Model 2 |       |                 | Model 3 |       |                 | Model 4 |       |                 |
|---------------------------------------------------------------------|---------|-------|-----------------|---------|-------|-----------------|---------|-------|-----------------|---------|-------|-----------------|
|                                                                     | $\beta$ | SE    | p-value         |
| Age                                                                 | 0.004   | 0.025 | 0.88            | -       | -     | -               | -       | -     | -               | -       | -     | -               |
| Sex                                                                 | -0.65   | 0.79  | 0.41            | -       | -     | -               | -       | -     | -               | -       | -     | -               |
| Systolic BP                                                         | -0.011  | 0.014 | 0.4             | -0.012  | 0.014 | 0.37            | -       | -     | -               | -       | -     | -               |
| Diastolic BP                                                        | -0.002  | 0.018 | 0.9             | -0.005  | 0.019 | 0.79            | 0.013   | 0.027 | 0.63            | 0.026   | 0.03  | 0.39            |
| Heart rate                                                          | 0.033   | 0.016 | <b>0.04</b>     | 0.035   | 0.018 | 0.05            | 0.038   | 0.019 | <b>0.04</b>     | 0.029   | 0.022 | 0.19            |
| eGFR                                                                | -0.022  | 0.012 | 0.08            | -0.025  | 0.013 | 0.05            | -0.025  | 0.014 | 0.08            | -       | -     | -               |
| Surgery                                                             | 0.38    | 0.8   | 0.63            | 0.48    | 0.8   | 0.55            | -       | -     | -               | -       | -     | -               |
| JCS                                                                 | 1.04    | 0.42  | <b>0.01</b>     | 1.03    | 0.43  | <b>0.02</b>     | 0.9     | 0.52  | 0.09            | 0.86    | 0.71  | 0.23            |
| Past history                                                        |         |       |                 |         |       |                 |         |       |                 |         |       |                 |
| A Fib                                                               | 1.79    | 0.8   | <b>0.03</b>     | 1.87    | 0.83  | <b>0.02</b>     | 1.89    | 0.88  | <b>0.03</b>     | -       | -     | -               |
| CAD                                                                 | -14.08  | 1721  | 0.99            | -13.99  | 1722  | 0.99            | -13.5   | 1780  | 0.99            | -       | -     | -               |
| Other CVD                                                           | -15.23  | 1650  | 0.99            | -15.32  | 1649  | 0.99            | -15.4   | 1609  | 0.99            | -       | -     | -               |
| PAD                                                                 | 0.44    | 0.69  | 0.53            | 0.44    | 0.71  | 0.53            | 0.56    | 0.72  | 0.44            | 1.39    | 0.84  | 0.09            |
| VTE                                                                 | 0       | -     | -               | 0       | -     | -               | 0       | -     | -               | 0       | -     | -               |
| LV dysfunction                                                      | 0       | -     | -               | 0       | -     | -               | 0       | -     | -               | -       | -     | -               |
| HT                                                                  | 14.1    | 1594  | 0.99            | 14.09   | 1589  | 0.99            | 14.59   | 1621  | 0.99            | 16.68   | 4979  | 0.99            |
| DM                                                                  | -0.38   | 1.06  | 0.72            | -0.32   | 1.06  | 0.76            | -       | -     | -               | -       | -     | -               |
| DLp                                                                 | -1.02   | 1.05  | 0.33            | -1      | 1.06  | 0.34            | -       | -     | -               | -       | -     | -               |
| Genetic and others                                                  | -14.07  | 1681  | 0.99            | -13.84  | 1682  | 0.99            | -13.99  | 1749  | 0.99            | -16     | 5052  | 0.99            |
| Smoking                                                             | 0.26    | 0.69  | 0.71            | -0.099  | 0.8   | 0.9             | -       | -     | -               | -       | -     | -               |
| Alcohol                                                             | -0.15   | 0.65  | 0.82            | -0.42   | 0.68  | 0.54            | -0.29   | 0.73  | 0.69            | -0.64   | 0.86  | 0.46            |
| post-AVR                                                            | -14.1   | 1749  | 0.99            | -13.79  | 1754  | 0.99            | -13.8   | 1788  | 0.99            | -16.1   | 4672  | 0.99            |
| post-MVR                                                            | -11.01  | 2104  | 0.99            | -11.24  | 2140  | 0.99            | -11.7   | 2274  | 0.99            | -2.72   | 36423 | 0.99            |
| CABG                                                                | -12.01  | 1962  | 0.99            | -12.21  | 1995  | 0.99            | -11.1   | 2106  | 0.99            | -0.2    | 20754 | 1               |
| Intervention to aortic aneurysm and/or dissection                   | -15.21  | 1776  | 0.99            | -15.16  | 1769  | 0.99            | -15     | 1771  | 0.99            | -15.5   | 3049  | 0.99            |
| Complication                                                        |         |       |                 |         |       |                 |         |       |                 |         |       |                 |
| Major bleeding                                                      | 3.82    | 0.68  | <b>&lt;0.01</b> | 4.17    | 0.81  | <b>&lt;0.01</b> | 4.96    | 1.12  | <b>&lt;0.01</b> | 4.87    | 1.3   | <b>&lt;0.01</b> |
| Infarction by aortic dissection                                     | 2.58    | 0.66  | <b>&lt;0.01</b> | 2.6     | 0.66  | <b>&lt;0.01</b> | 2.93    | 0.74  | <b>&lt;0.01</b> | 2.55    | 0.82  | <b>&lt;0.01</b> |
| Paroxymal A Fib                                                     | -14.1   | 1623  | 0.99            | -13.95  | 1622  | 0.99            | -13.7   | 1586  | 0.99            | -16.1   | 5844  | 0.99            |
| Medication on admission                                             |         |       |                 |         |       |                 |         |       |                 |         |       |                 |
| RAAS inhibitor                                                      | -16.67  | 1876  | 0.99            | -16.64  | 1879  | 0.99            | -16.8   | 1837  | 0.99            | -17.88  | 2867  | 0.99            |
| CCB                                                                 | -0.014  | 0.69  | 0.98            | 0.14    | 0.71  | 0.85            | 0.079   | 0.76  | 0.92            | 0.05    | 0.85  | 0.95            |
| $\beta$ -blocker                                                    | -0.81   | 1.06  | 0.44            | -0.7    | 1.02  | 0.51            | -0.98   | 1.09  | 0.37            | -18.1   | 3078  | 0.99            |
| diuretics                                                           | -14.05  | 2135  | 0.99            | -14.13  | 2151  | 0.99            | -14.4   | 2232  | 0.99            | -17.7   | 6448  | 0.99            |
| $\alpha$ -blocker                                                   | -14.05  | 2021  | 0.99            | -13.99  | 2021  | 0.99            | -13.8   | 2025  | 0.99            | -16.2   | 7084  | 0.99            |
| warfarin                                                            | -15.13  | 2435  | 0.99            | -14.86  | 2386  | 0.99            | -14.8   | 2284  | 0.99            | -15.9   | 2732  | 0.99            |
| DOAC                                                                | -13.02  | 2372  | 0.99            | -13.32  | 2347  | 0.99            | -12.7   | 2425  | 0.99            | -17.7   | 46153 | 0.99            |
| aspirin                                                             | -15.17  | 2114  | 0.99            | -15.46  | 2096  | 0.99            | -15.2   | 2221  | 0.99            | -17.9   | 4184  | 0.99            |
| clopidogrel                                                         | -12.03  | 1628  | 0.99            | -12.25  | 1637  | 0.99            | -13.1   | 2527  | 0.99            | -15.7   | 18002 | 0.99            |
| cilostazol                                                          | -13.06  | 1757  | 0.99            | -13.7   | 1797  | 0.99            | -13.3   | 2184  | 0.99            | 0       | -     | -               |
| prasugrel                                                           | 0       | -     | -               | 0       | -     | -               | 0       | -     | -               | 0       | -     | -               |
| other anti-platelet drug                                            | -12.01  | 2395  | 0.99            | -12.37  | 2454  | 0.99            | -11.6   | 2603  | 0.99            | -18.2   | 35679 | 0.99            |
| Anti-thrombus during hospitalization                                |         |       |                 |         |       |                 |         |       |                 |         |       |                 |
| Anti-coagulant (warfarin or DOAC)                                   | -15.13  | 2087  | 0.99            | -15.03  | 2073  | 0.99            | -14.9   | 2056  | 0.99            | -16.2   | 3448  | 0.99            |
| Anti-platelet drug (aspirin, clopidogrel, cilostazol, or prasugrel) | -0.38   | 1.06  | 0.72            | -0.31   | 1.08  | 0.78            | -0.04   | 1.11  | 0.97            | 0.34    | 1.17  | 0.77            |
| Both anti-coagulant and anti-platelet                               | -12.01  | 1770  | 0.99            | -12.29  | 1802  | 0.99            | -11.23  | 1907  | 0.99            | -15.3   | 19601 | 0.99            |
| Anti-coagulant or anti-platelet                                     | -0.91   | 1.06  | 0.39            | -0.82   | 1.08  | 0.44            | -0.62   | 1.09  | 0.57            | -0.46   | 1.13  | 0.68            |

Model 1 : Unadjusted

Model 2 : Adjusted for age and sex

Model 3 : Adjusted for age, sex, surgery, systolic BP, DLp, DM and smoking

Model 4 : Model 3 + history of A fib, CAD, other CVD and LV dysfunction

SE; standard error, HR, hazard ratio, BP; blood pressure, eGFR; estimated glomerular filtration rate, A Fib; atrial fibrillation, CAD; coronary artery diseases, CVD; cardiovascular diseases, PAD; peripheral arterial diseases, VTE; venous thromboembolism, LV; left ventricular, HT; hypertension, DM; diabetes mellitus, DLp; dyslipidemia, AVR; aortic valve replacement, MVR; mitral valve replacement, CABG; coronary artery bypass grafting, RAAS; renin-angiotensin-aldosterone system, CCB; calcium channel blocker, DOAC; direct oral anti-coagulant.

Genetic and others includes Marfan syndrome, Loeys-Dietz syndrome, and Behçet's disease.
