# Supplementary material for: Use of Anti-Thrombotic Drugs and In-Hospital Mortality in Acute Aortic Dissection Patients
Source: MDPI journal article supplement (doi:10.3390/diagnostics12102322), 2022-09-26
Supplement: s1 [file s1]

**Suppl Table S2. Cox proportional hazard model for all-cause mortality in TRANSFERRED acute aortic dissection patients (type B)**

|                                                                     | Model 1 |      |                 | Model 2 |      |                 | Model 3 |       |                 | Model 4 |       |                 |
|---------------------------------------------------------------------|---------|------|-----------------|---------|------|-----------------|---------|-------|-----------------|---------|-------|-----------------|
|                                                                     | $\beta$ | SE   | p-value         | $\beta$ | SE   | p-value         | $\beta$ | SE    | p-value         | $\beta$ | SE    | p-value         |
| Age                                                                 | 0.0005  | 0.02 | 0.98            | -       | -    | -               | -       | -     | -               | -       | -     | -               |
| Sex                                                                 | -0.64   | 0.65 | 0.32            | -       | -    | -               | -       | -     | -               | -       | -     | -               |
| Systolic BP                                                         | -0.03   | 0.01 | <b>0.02</b>     | -0.03   | 0.01 | <b>0.01</b>     | -       | -     | -               | -       | -     | -               |
| Diastolic BP                                                        | -0.02   | 0.02 | 0.24            | -0.02   | 0.02 | 0.18            | 0.006   | 0.024 | 0.8             | 0.01    | 0.03  | 0.63            |
| Heart rate                                                          | 0.03    | 0.01 | <b>0.04</b>     | 0.03    | 0.02 | 0.05            | 0.04    | 0.02  | <b>0.02</b>     | 0.02    | 0.02  | 0.25            |
| eGFR                                                                | -0.02   | 0.01 | <b>0.04</b>     | -0.02   | 0.01 | <b>0.02</b>     | -0.03   | 0.01  | <b>0.04</b>     | -       | -     | -               |
| Surgery                                                             | 0.77    | 0.59 | 0.19            | 0.85    | 0.59 | 0.15            | -       | -     | -               | -       | -     | -               |
| JCS                                                                 | 1.23    | 0.25 | <b>&lt;0.01</b> | 1.23    | 0.26 | <b>&lt;0.01</b> | 0.86    | 0.42  | <b>0.04</b>     | 0.55    | 0.58  | 0.35            |
| Past history                                                        |         |      |                 |         |      |                 |         |       |                 |         |       |                 |
| A Fib                                                               | 1.93    | 0.67 | <b>&lt;0.01</b> | 2.05    | 0.69 | <b>&lt;0.01</b> | 2.1     | 0.72  | <b>0.004</b>    | -       | -     | -               |
| CAD                                                                 | -14.08  | 1484 | 0.99            | -14     | 1480 | 0.99            | -13.9   | 1557  | 0.99            | -       | -     | -               |
| Other CVD                                                           | 0.18    | 0.77 | 0.81            | 0.16    | 0.78 | 0.83            | 0.03    | 0.8   | 0.97            | -       | -     | -               |
| PAD                                                                 | 0.47    | 0.6  | 0.43            | 0.5     | 0.61 | 0.41            | 0.42    | 0.63  | 0.51            | 0.77    | 0.75  | 0.31            |
| VTE                                                                 | 0       | -    | -               | 0       | -    | -               | 0       | -     | -               | 0       | -     | -               |
| LV dysfunction                                                      | 0       | -    | -               | 0       | -    | -               | 0       | -     | -               | -       | -     | -               |
| HT                                                                  | 14.09   | 1400 | 0.99            | 14.07   | 1400 | 0.99            | 14.4    | 1435  | 0.99            | 14.5    | 2278  | 0.99            |
| DM                                                                  | 0.12    | 0.77 | 0.87            | 0.17    | 0.77 | 0.82            | -       | -     | -               | -       | -     | -               |
| DLp                                                                 | -0.04   | 0.66 | 0.95            | -0.02   | 0.66 | 0.98            | -       | -     | -               | -       | -     | -               |
| Genetic and others                                                  | -14.07  | 1509 | 0.99            | -14.11  | 1513 | 0.99            | -14     | 1560  | 0.99            | -14.6   | 2338  | 0.99            |
| Smoking                                                             | 0.21    | 0.6  | 0.72            | -0.01   | 0.7  | 0.99            | -       | -     | -               | -       | -     | -               |
| Alcohol                                                             | -0.2    | 0.57 | 0.73            | -0.39   | 0.6  | 0.52            | -0.25   | 0.65  | 0.71            | -0.35   | 0.76  | 0.65            |
| post-AVR                                                            | -14.09  | 1577 | 0.99            | -14.02  | 1587 | 0.99            | -14.2   | 1695  | 0.99            | -14.5   | 1898  | 0.99            |
| post-MVR                                                            | -11.01  | 1501 | 0.99            | -11.13  | 1515 | 0.99            | -11.4   | 1646  | 0.99            | -1.43   | 10117 | 0.99            |
| CABG                                                                | -12.01  | 1543 | 0.99            | -12.16  | 1558 | 0.99            | -11.8   | 1685  | 0.99            | -1.02   | 6215  | 0.99            |
| Intervention to aortic aneurysm and/or dissection                   | -0.45   | 1.04 | 0.67            | -0.41   | 1.05 | 0.7             | -0.5    | 1.1   | 0.64            | -15.6   | 2271  | 0.99            |
| Complication                                                        |         |      |                 |         |      |                 |         |       |                 |         |       |                 |
| Major bleeding                                                      | 3.87    | 0.59 | <b>&lt;0.01</b> | 4.24    | 0.71 | <b>&lt;0.01</b> | 4.77    | 0.94  | <b>&lt;0.01</b> | 4.42    | 1.11  | <b>&lt;0.01</b> |
| Infarction by aortic dissection                                     | 2.04    | 0.57 | <b>&lt;0.01</b> | 2.04    | 0.57 | <b>&lt;0.01</b> | 2.12    | 0.61  | <b>&lt;0.01</b> | 2.16    | 0.72  | <b>&lt;0.01</b> |
| Paroxymal A Fib                                                     | -14.09  | 1435 | 0.99            | -13.95  | 1435 | 0.99            | -14     | 1492  | 0.99            | -14.1   | 2302  | 0.99            |
| Medication on admission                                             |         |      |                 |         |      |                 |         |       |                 |         |       |                 |
| RAAS inhibitor                                                      | -16.67  | 1711 | 0.99            | -16.6   | 1710 | 0.99            | -16.7   | 1742  | 0.99            | -17.6   | 1910  | 0.99            |
| CCB                                                                 | 0.14    | 0.61 | 0.82            | 0.33    | 0.63 | 0.6             | 0.19    | 0.69  | 0.78            | -0.17   | 0.84  | 0.84            |
| $\beta$ -blocker                                                    | -0.2    | 0.78 | 0.8             | -0.05   | 0.78 | 0.94            | -0.33   | 0.82  | 0.69            | -1.39   | 1.17  | 0.24            |
| diuretics                                                           | 1.9     | 0.79 | <b>0.02</b>     | 1.83    | 0.79 | <b>0.02</b>     | 1.88    | 0.87  | <b>0.03</b>     | 0.91    | 1.14  | 0.43            |
| $\alpha$ -blocker                                                   | -14.05  | 1838 | 0.99            | -13.97  | 1835 | 0.99            | -14.1   | 1840  | 0.99            | -15     | 3093  | 0.99            |
| warfarin                                                            | 0.4     | 1.06 | 0.71            | 0.7     | 1.07 | 0.51            | 0.64    | 1.09  | 0.56            | -1.05   | 1.59  | 0.51            |
| DOAC                                                                | -13.02  | 2047 | 0.99            | -13.25  | 2020 | 0.99            | -13.2   | 2205  | 0.99            | -15.5   | 6501  | 0.99            |
| aspirin                                                             | -15.16  | 1903 | 0.99            | -15.33  | 1875 | 0.99            | -15.5   | 1957  | 0.99            | -16.7   | 2867  | 0.99            |
| clopidogrel                                                         | -13.04  | 2043 | 0.99            | -13.26  | 2052 | 0.99            | -13.2   | 1963  | 0.99            | -13.8   | 6529  | 0.99            |
| cilostazol                                                          | -13.05  | 1571 | 0.99            | -13.68  | 1616 | 0.99            | -14.7   | 2098  | 0.99            | 0       | -     | -               |
| prasugrel                                                           | 0       | -    | -               | 0       | -    | -               | 0       | -     | -               | 0       | -     | -               |
| other anti-platelet drug                                            | -12.01  | 2086 | 0.99            | -12.41  | 2152 | 0.99            | -11.4   | 1486  | 0.99            | -15.3   | 8158  | 0.99            |
| Anti-coagulant (warfarin or DOAC)                                   | -0.12   | 1.04 | 0.91            | 0.05    | 1.05 | 0.96            | 0.24    | 1.08  | 0.83            | -0.86   | 1.45  | 0.55            |
| Anti-platelet drug (aspirin, clopidogrel, cilostazol, or prasugrel) | -15.19  | 1457 | 0.99            | -15.19  | 1449 | 0.99            | -15.1   | 1556  | 0.99            | -16.8   | 2309  | 0.99            |
| Both anti-coagulant and anti-platelet                               | -13.03  | 1218 | 0.99            | -13.01  | 1217 | 0.99            | -13.1   | 1428  | 0.99            | -14.9   | 2180  | 0.99            |
| Anti-coagulant or anti-platelet                                     | -1.02   | 1.04 | 0.33            | -0.94   | 1.05 | 0.37            | -0.68   | 1.1   | 0.54            | -2.6    | 1.8   | 0.15            |

Model 1 : Unadjusted

Model 2 : Adjusted for age and sex

Model 3 : Adjusted for age, sex, surgery, systolic BP, DLp, DM and smoking

Model 4 : Model 3 + history of A fib, CAD, other CVD and LV dysfunction

SE; standard error, HR, hazard ratio, BP; blood pressure, eGFR; estimated glomerular filtration rate, A Fib; atrial fibrillation, CAD; coronary artery diseases, CVD; cardiovascular diseases, PAD; peripheral arterial diseases, VTE; venous thromboembolism, LV; left ventricular, HT; hypertension, DM; diabetes mellitus, DLp; dyslipidemia, AVR; aortic valve replacement, MVR; mitral valve replacement, CABG; coronary artery bypass grafting, RAAS; renin-angiotensin-aldosterone system, CCB; calcium channel blocker, DOAC; direct oral anti-coagulant.

Genetic and others includes Marfan syndrome, Loeys-Dietz syndrome, and Behçet's disease.
